# 1 Lockdown, relaxation, and ACME period in COVID-19: A 2 study of disease dynamics in Hermosillo, Sonora, Mexico

3 Mayra R. Tocto-Eraza<sup>1</sup>, Jorge A. Espíndola-Zepeda<sup>1</sup>, José A. Montoya-Laos<sup>1</sup>,  
Manuel A. Acuña-Zegarra<sup>1</sup>, Daniel Olmos-Liceaga<sup>1</sup>, Pablo A. Reyes-Castro<sup>2</sup>,  
Gudelia Figueroa-Preciado<sup>1\*</sup>

1 Departamento de Matemáticas, Universidad de Sonora, Blvd. Rosales y Luis Encinas S/N,  
Hermosillo, Sonora, C.P. 83000, México.

2 Centro de Estudios en Salud y Sociedad, El Colegio de Sonora, Av. Obregón 54,  
Hermosillo, Sonora, C.P. 83000, México.

## 4 **Abstract**

5 Lockdown and social distancing measures have been implemented for many countries to mitigate  
6 the impacts of the COVID-19 pandemic and prevent overwhelming of health services. However,  
7 success on this strategy depends not only on the timing of its implementation, but also on the relax-  
8 ation measures adopted within each community. We developed a mathematical model to evaluate  
9 the impacts of the lockdown implemented in Hermosillo, Mexico. We compared this intervention  
10 with some hypothetical ones, varying the starting date and also the population proportion that is  
11 released, breaking the confinement. A Monte Carlo study was performed by considering three sce-  
12 narios to define our baseline dynamics. Results showed that a hypothetical delay of two weeks, on  
13 the lockdown measures, would result in an early ACME around May 9 for hospitalization preva-  
14 lence and an increase on cumulative deaths, 42 times higher by May 31, when compared to baseline.  
15 On the other hand, results concerning relaxation dynamics showed that the ACME levels depend  
16 on the proportion of people who gets back to daily activities as well as the individual behavior with  
17 respect to prevention measures. Analysis regarding different relaxing mitigation measures were  
18 provided to the Sonoran Health Ministry, as requested. It is important to stress that, according  
19 to information provided by health authorities, the ACME occurring time was closed to the one  
20 given by our model. Hence, we considered that our model resulted useful for the decision-making  
21 assessment, and that an extension of it can be used for the study of a potential second wave.

## 1 Introduction

In late December 2019, a novel coronavirus SARS-CoV-2 (severe acute respiratory syndrome coronavirus 2) was first reported in Wuhan, China [1, 2]. Since then, the pandemic of Coronavirus Disease (COVID-19) has spread in 188 countries, with 21,809,170 millions of infections and 772,452 deaths registered worldwide [3]. Mexico reported its first case in late February 2020, and by the middle of August, public health authorities confirmed around 525,733 infections and more than 57,023 deaths [4]. Based on their clinical manifestations, cases have ranged from mild/moderate to severe, and even some in critical conditions. Severity illness and risk of mortality increase by age and also by the presence of some underlying conditions like hypertension, diabetes, cardiovascular, and cerebrovascular disease [5]. COVID-19 most common symptoms are fever, fatigue, dry cough, myalgia, and severe cases frequently include dyspnea and/or hypoxemia [5, 6, 7].

SARS-CoV-2, the virus that causes COVID-19, is highly infectious and spreads predominantly from person-to-person. In the absence of a vaccine or an effective treatment, some non-pharmaceutical community strategies like isolation, testing, contact tracing, and physical distancing have been the main interventions adopted by most of the nations to mitigate this pandemic and reduce the velocity of transmission [8, 9]. From the middle of March to May 30th, Mexican Ministry of Health implemented a National Campaign for Healthy Distance (Jornada Nacional de Sana Distancia), a public health intervention based on physical distancing measures, closing schools as well as non-essential workplaces, and asking for citizens to stay-at-home [10]. However, federal measures demand not only a strong inter-jurisdictional coordination between national, state, and local government levels [11], but also a comprehensive understanding of the disease transmission dynamic, to achieve timely interventions within each locality.

The comprehension of this pandemic has grab the interest of many scientific areas, mainly with the aim of providing ideas that could reduce the severity of the disease. In particular, the area of mathematical modeling has drawn the attention during this epidemic mostly due to its usefulness in providing information about the evolution of transmissible diseases. Current work is focused on parameter estimation that serves as a basis for more complex studies [12], the evaluation of non-pharmacological interventions during the epidemic, such as social distancing or lockdown [13, 14, 15, 16, 17, 18] and forecast short term trends of the disease [19]. In general, one of the main purposes of mathematical models has been the evaluation of the effects of different governmental interventions and also providing to decision-makers with more elements for responding to a need, in a more conscious manner [20].

This work aims to evaluate the lockdown and relaxation measures implemented in Hermosillo, Sonora, Mexico. In order to reach our purpose, we developed a mathematical model of the Kermack-McKendrick type. We used some statistical techniques to have the profile of a baseline scenario for being compared with some hypothetical ones, varying the starting date and the population proportion released, breaking the confinement. It is known that COVID-19 predictions are not an easy task, even if data is available from the beginning of the epidemic [21]. Nevertheless, in our case, data availability made possible to uncover robust information that was useful for decision-making.

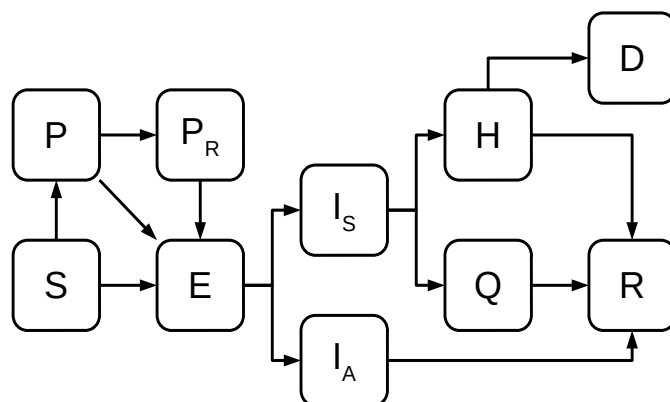

Figure 1: **Flow diagram of the mathematical model.**  $S, E, I_A, I_S, H, Q, R, D$  represent the populations of susceptible, exposed, asymptotically infected, symptomatically infected, hospitalized, quarantined, recovered and dead individuals, respectively. Protected individuals ( $P$ ) get involved in the disease dynamics when mitigation measures are implemented, whereas released population ( $P_R$ ) does so when relaxation of these measures occurs.

1 Our manuscript is organized as follows. Initially, we present our proposed mathematical model.  
2 Then, statistical analyses of different parameter scenarios, that validate the data, are presented. A  
3 discussion about the results obtained with the adjusted models is included. Our results arise from  
4 the statistical and modeling perspectives and are related to the ACME occurring time, implications  
5 of lockdown occurrence time, and consequences of the lifting mitigation measures. Finally, we end  
6 up with a discussion section.

## 7 **2 Methods**

### 8 **2.1 Compartmental mathematical model**

9 We formulate a compartmental mathematical model, whose diagram can be observed in Fig 1,  
10 where susceptible ( $S$ ), exposed ( $E$ ), asymptomatic infectious ( $I_A$ ), symptomatic infectious ( $I_S$ ),  
11 recovered ( $R$ ), quarantined ( $Q$ ), hospitalized ( $H$ ), and dead individuals ( $D$ ) are considered.  $P$  rep-  
12 represents a proportion of individuals in the population that decided to stay at home in order to protect  
13 themselves from illness, and  $P_R$  are those released from the  $P$  class, when certain proportion of  
14 protected individuals needed or decided to break control measures.

15 To formulate the mathematical model, we considered that susceptible individuals are moved to  
16 the protected class when they obey the mitigation measures implemented by the government and  
17 some become infected but not yet infectious (exposed class) when interacting with an infectious  
18 individual. Dynamics of protected individuals is similar; that is, they either can become infected  
19 when interacting with an infectious individual or moved to the protected released class. This last is

1 a result of a mitigation measures break up (a proportion of the protected population returns to their  
 2 usual activities). On the other hand, protected released people only leave the class by the interplay  
 3 with symptomatic or asymptomatic individuals (becoming infected but not yet infectious). The  
 4 exposed class represents individuals that are infected but not infectious. After a while, an exposed  
 5 individual can become infectious, asymptomatic, mildly symptomatic, or severe symptomatic. As  
 6 a first approximation and to analyze data of a specific Mexican state, we considered that the stages  
 7 previously mentioned are grouped into two classes: i) asymptomatic people ( $I_A$ ), and severe symp-  
 8 tomatic people ( $I_S$ ). We assumed that mildly symptomatic people can be distributed in both classes.  
 9 People from  $I_A$  class are recovered with a mean time equal to  $1/\eta_a$ . In contrast, individuals from  
 10  $I_S$  class are identified as infected after  $1/\gamma_s$  days (on average), after which they are reported and  
 11 become hospitalized or quarantined/ambulatory. We considered that ambulatory individuals might  
 12 recover or worsen their condition, being then hospitalized. This happens after  $1/\psi$  days (on av-  
 13 erage). Finally, we assumed that only hospitalized individuals may die, and that occurs after  $1/\mu$   
 14 days, on average.

Following the hypotheses previously stated, the mathematical model is given by

$$\begin{aligned}
 \dot{S} &= -\left(\frac{\alpha_a I_A + \alpha_s I_S}{N^*}\right)S - \omega_1(t)S \\
 \dot{P} &= \omega_1(t)S - \left(\frac{\tilde{\alpha}_a I_A + \tilde{\alpha}_s I_S}{N^*}\right)P - \omega_2(t)P \\
 \dot{P}_R &= \omega_2(t)P - \left(\frac{\hat{\alpha}_a I_A + \hat{\alpha}_s I_S}{N^*}\right)P_R \\
 \dot{E} &= \left(\frac{\alpha_a I_A + \alpha_s I_S}{N^*}\right)S + \left(\frac{\tilde{\alpha}_a I_A + \tilde{\alpha}_s I_S}{N^*}\right)P + \left(\frac{\hat{\alpha}_a I_A + \hat{\alpha}_s I_S}{N^*}\right)P_R - \delta E \\
 \dot{I}_A &= (1 - \theta)\delta E - \eta_a I_A \\
 \dot{I}_S &= \theta\delta E - \gamma_s I_S \\
 \dot{H} &= \beta\gamma_s I_S + \tau\psi Q - \mu H \\
 \dot{Q} &= (1 - \beta)\gamma_s I_S - \psi Q \\
 \dot{R} &= \eta_a I_A + (1 - \nu)\mu H + (1 - \tau)\psi Q \\
 \dot{D} &= \nu\mu H
 \end{aligned} \tag{2.1}$$

15 where  $N^* = S + E + I_A + I_S + R + P + P_R$ . It is important to emphasize that the infection contact  
 16 rates of released protected people are less or equal than the infection contact rates of susceptible  
 17 individuals. On the other hand,  $\nu$  and  $(1 - \nu)$  represent the proportion of hospitalized individuals that  
 18 recover or die, respectively. Likewise,  $\tau$  and  $(1 - \tau)$  are the proportions of ambulatory individuals  
 19 who are hospitalized and recovered, respectively. Parameters  $\omega_1(t)$  and  $\omega_2(t)$  are described in the  
 20 next subsection, while other parameters definition can be seen in Table 1.

| Parameter                                      | Definition                                                                                                           |
|------------------------------------------------|----------------------------------------------------------------------------------------------------------------------|
| $\alpha_a, (\tilde{\alpha}_a, \hat{\alpha}_a)$ | Transmission contact rates for susceptible (protected, protected released) class linked to asymptomatic individuals. |
| $\alpha_s, (\tilde{\alpha}_s, \hat{\alpha}_s)$ | Transmission contact rates for susceptible (protected, protected released) class linked to symptomatic individuals.  |
| $\delta$                                       | Incubation rate.                                                                                                     |
| $\theta$                                       | Proportion of symptomatic individuals.                                                                               |
| $\eta_a$                                       | Recovery rate for asymptomatic individuals.                                                                          |
| $\gamma_s$                                     | Output rate from the symptomatic class by register.                                                                  |
| $\beta$                                        | Proportion of hospitalized individuals.                                                                              |
| $\psi$                                         | Output rate from the quarantined class by hospitalization/recovery.                                                  |
| $\mu$                                          | Output rate from the hospitalized class by recovery/death.                                                           |

Table 1: System 2.1 parameter definition and their description.

### 1 2.1.1 Modeling the effects of intervention measures

2 As happened in other countries, Mexico also implemented control measures to fight against COVID-  
3 19. These intervention measures are mainly based on social distancing, in order to reduce contact  
4 between people. However, not all Mexican States started these control measures at the same time.

The implementation of social distancing resulted in a proportion of the population being protected by staying at home. For that reason, we modeled this event considering that susceptible individuals moved to the protected class during some period. This phenomenon occurs until a certain percentage of the population is reached. We represent this period by  $[T_{L_1}, T_{U_1}]$ . The mathematical description of the dynamics is given by

$$\omega_1(t) = \begin{cases} 0 & , \quad 0 \leq t < T_{L_1}, \\ w_{10} & , \quad T_{L_1} \leq t < T_{U_1}, \\ 0 & , \quad T_{U_1} \leq t, \end{cases} \quad (2.2)$$

and parameter  $w_{10}$  represents the protection rate of susceptible individuals per unit of time. On the other hand, at the moment of writing this paper, it has been observed that many people who were initially obeying mitigation measures have now broken the confinement, going back to their usual activities. For that reason, we consider that certain proportion of protected people become protected released people. We model this phenomenon in a similar way to the one presented in previous function. Thus

$$\omega_2(t) = \begin{cases} 0 & , \quad 0 \leq t < T_{L_2}, \\ w_{20} & , \quad T_{L_2} \leq t < T_{U_2}, \\ 0 & , \quad T_{U_2} \leq t. \end{cases} \quad (2.3)$$

5 Here, period from  $T_{L_2}$  to  $T_{U_2}$  represents the time in which a percentage of the population that breaks  
6 the confinement is reached.

1 **Remark 1** *In order to select  $w_{10}$  and  $w_{20}$  we follow the classical population decay equation  $\frac{dX}{dt} =$*   
2  *$-w_{i0}X$  and take the value of  $w_{i0}$  such that a given proportion of  $X$  leaves the class  $X$  in a given time*  
3 *interval.*

## 4 **2.2 Monte Carlo Study**

5 We performed a Monte Carlo study where different distributions were considered for the parameters  
6 included in the mathematical model presented in System 2.1. The election of these distributions re-  
7 lied not only on the researcher knowledge but also in an extensive search in related literature. Three  
8 different scenarios were considered when fitting some epidemic curves derived from this mathe-  
9 matical model (System 2.1), to the data observed in Hermosillo, Sonora, considering a constraint  
10 on the prevalence of COVID-19. As a result of the analyses performed by these three researchers  
11 (Scenario 1, Scenario 2 and Scenario 3), we obtained quantile-based intervals, where model param-  
12 eters can range. These possible parameter values allowed us to explore not only characteristics of  
13 the COVID-19 outbreak in Hermosillo, Sonora, like the ACME value and ACME date, but also we  
14 were able to explore different intervention schemes such as: changes in the beginning and lifting  
15 restriction dates, variation in the population proportions that return to usual activities on June 01,  
16 2020, a date fixed by Federal Government.

17 The Monte Carlo method that was considered here for exploring epidemic characteristics of the  
18 COVID-19 outbreak consists of the following steps.

19 • **Initial conditions for the model:** According to the Mexican National Population Council  
20 (CONAPO), projections for 2020 population in Hermosillo is about 930669 people [22].  
21 Regarding the first COVID-19 case registered in Hermosillo by the Sonoran Health System,  
22 it occurred in March 16, 2020, being March 11 the registered date of onset symptoms. In this  
23 way, we considered March 11 as the starting date for simulations, with the following initial  
24 conditions:  $S(0) = 930668$ ,  $I_S(0) = 1$ , and  $E(0) = I_A(0) = H(0) = D(0) = Q(0) = R(0) =$   
25  $P(0) = P_L(0) = 0$ .

26 • **On-and-off periods of social distancing:** On March 16, date of the first coronavirus case  
27 in Sonora, a mandatory confinement was declared by the state governor. This statewide  
28 stay-home directive was intended to avoid the spread of this coronavirus. Nevertheless, even  
29 on May 6, 2020, Sonora State government divulged a video message asking citizens for  
30 remaining in quarantine and taking social distancing seriously, since a considerable increase  
31 in the number of cases were occurring.

32 Considering the above information, we assumed that the period from March 16 to April 15  
33 was the first period of social distancing, where a considerable proportion of susceptible pop-  
34 ulation became protected, thus  $[T_{L_1}, T_{U_1}] = [5, 35]$ . A second period was fixed from April  
35 30 to May 15, that is  $[T_{L_2}, T_{U_2}] = [50, 65]$ . It is important to point out that our motivation  
36 for considering periods instead of specific dates for breaking the confinement, is supported  
37 by the occurrence of two important dates in Mexico, children's day (April 30) and mother's  
38 day (May 10).

- 1 • **Model parameter distributions:** We set three different scenarios where different probabil-  
 2 ity distributions were considered for modeling parameters included in System 2.1. These  
 3 parameters, as well as their selected distributions, are shown in Table 2.

| Parameter          | Scenario 1                                | Scenario 2                                    | Scenario 3                            |
|--------------------|-------------------------------------------|-----------------------------------------------|---------------------------------------|
| $\alpha_a$         | $\mathcal{N}_{1.22,1.27}(1.2458, 0.0115)$ | $\mathcal{N}_{1.2440,1.5653}(1.3879, 0.125)$  | $\mathcal{N}_{0,\infty}(1.198, 0.05)$ |
| $\alpha_s$         | $\mathcal{N}_{1.10,1.30}(1.2076, 0.0464)$ | $\mathcal{N}_{0.8759,0.9949}(0.9149, 0.06)$   | $\mathcal{N}_{0,\infty}(0.657, 0.05)$ |
| $\tilde{\alpha}_a$ | $\mathcal{N}_{0,0.04}(0.0074, 0.0114)$    | $\mathcal{N}_{0,0.0150}(0.0064, 0.175)$       | $\mathcal{N}_{0,\infty}(0.02, 0.05)$  |
| $\tilde{\alpha}_s$ | $\mathcal{N}_{1.19,1.21}(1.2010, 0.0042)$ | $\mathcal{N}_{0.2889,0.5433}(0.4194, 0.20)$   | $\mathcal{N}_{0,\infty}(0.02, 0.05)$  |
| $\hat{\alpha}_a$   | $\mathcal{U}(0.05, 0.25)$                 | $\mathcal{N}_{0.0009,0.0784}(0.0167, 0.045)$  | $\mathcal{N}_{0,\infty}(0.02, 0.05)$  |
| $\hat{\alpha}_s$   | $\mathcal{N}_{0.46,0.66}(0.5839, 0.0509)$ | $\mathcal{N}_{0.7368,0.9789}(0.8772, 0.175)$  | $\mathcal{N}_{0,\infty}(0.02, 0.05)$  |
| $\delta$           | $\mathcal{N}_{0.25,0.35}(0.2923, 0.0211)$ | $\mathcal{N}_{0.1703,0.2529}(0.1990, 0.040)$  | $\mathcal{IG}(25, 5)$                 |
| $\theta$           | $\mathcal{U}(0.01, 0.2)$                  | $\mathcal{N}_{0.2253,0.3737}(0.2618, 0.085)$  | $\mathcal{U}(0.17, 0.25)$             |
| $\eta_a$           | $\mathcal{N}_{0.08,0.2}(0.1503, 0.025)$   | $\mathcal{N}_{0.04,0.067}(0.0456, 0.02)$      | $\mathcal{IG}(105, 10)$               |
| $\gamma_s$         | $\mathcal{U}(0.5, 2)$                     | $\mathcal{N}_{0.7055,1.9143}(1.2415, 0.4)$    | $\mathcal{IG}(3, 1)$                  |
| $\beta$            | $\mathcal{U}(0.14, 0.25)$                 | $\mathcal{N}_{0.0727,0.1313}(0.1002, 0.055)$  | $\mathcal{B}(8, 50)$                  |
| $\tau$             | $\mathcal{U}(0, 0.2)$                     | $\mathcal{N}_{0.0277,0.0997}(0.0589, 0.035)$  | $\mathcal{U}(0.1, 0.3)$               |
| $\psi$             | $\mathcal{U}(0.01, 1)$                    | $\mathcal{N}_{0.05,0.16}(0.1062, 0.1)$        | $\mathcal{U}(0.06, 0.1)$              |
| $\mu$              | $\mathcal{U}(0.1, 0.8)$                   | $\mathcal{N}_{0.0615,0.14}(0.1146, 0.05)$     | $\mathcal{U}(0.05, 0.1)$              |
| $\nu$              | $\mathcal{U}(0.14, 0.3)$                  | $\mathcal{N}_{0.0901,0.2472}(0.1550, 0.04)$   | $\mathcal{U}(0.2, 0.4)$               |
| $w_{10}$           | $\mathcal{U}(0.04, 0.08)$                 | $\mathcal{N}_{0.0754,0.0864}(0.0809, 0.0075)$ | $\mathcal{U}(0.04, 0.08)$             |
| $w_{20}$           | $\mathcal{U}(0.003, 0.015)$               | $\mathcal{N}_{0.0001,0.0320}(0.0019, 0.0175)$ | $\mathcal{U}(0.007, 0.03)$            |

Table 2: Model parameter distributions. Here,  $\mathcal{N}_{a,b}(\mu_0, \sigma_0)$  is the truncated normal distribution with a truncation range  $(a, b)$ , where  $\mu_0$  and  $\sigma_0$  are the mean and variance of this distribution;  $\mathcal{IG}(\alpha_0, \beta_0)$  is the inverse gamma distribution with shape and scale parameters  $\alpha_0, \beta_0$ , respectively;  $\mathcal{B}(a, b)$  is the Beta distribution with parameters  $a$  and  $b$ ;  $\mathcal{U}(\min, \max)$  is a uniform distribution on an interval that goes from min to max.

4 Heuristic analysis was used by three different researchers, in order to propose the scenarios  
 5 presented in Table 2. Basically, the strategy was to delimit the support of these distributions,  
 6 either by considering a wide range for parameter values or by selecting these ranges based  
 7 on a bibliographic review. The fit of the model solutions, to the initially reported data, was  
 8 done either manually (visual-fit), through a shiny app created in Rstudio (script available on  
 9 a Github repository [23]), and also by minimizing the sum of squared errors. The values and  
 10 ranges of model parameters that were taken as a starting point to specify the support of these  
 11 distributions, are shown in Table 3. Some of these can be found on COVID-19 literature and  
 12 some others have been assumed by the authors.

13 Distributions for  $w_{10}$  and  $w_{20}$  parameters, were obtained as follows. In Scenario 3, we con-  
 14 sidered a  $\mathcal{U}(0.7, 0.9)$  distribution for the protected proportion of susceptible individuals, and  
 15 a  $\mathcal{U}(0.1, 0.35)$  distribution for the proportion of people who have broken the confinement.



1 Once we have a sample for each one of these proportions, we applied to these samples the  
 2 equation presented on Remark 1, considering that protected and released population pro-  
 3 portions are achieved within 30 and 15 days, respectively. The values obtained for  $w_{10}$  and  
 4  $w_{20}$  allowed us to propose the corresponding distributions given in Table 2 as well as the  
 5 parameters ranges shown in Table 3. A similar procedure was carried out to obtain the dis-  
 6 tributions for parameters  $w_{10}$  and  $w_{20}$  in Scenario 1, except that a  $\mathcal{U}(0.05, 0.2)$  distribution  
 7 was considered for the proportion of people who have broken the confinement. For Scenario  
 8 2, a  $\mathcal{B}(0.8, 0.05)$  distribution was used to describe the protected proportion of susceptible  
 9 individuals and a  $\mathcal{B}(0.05, 0.2)$  distribution for the proportion of people who have broken the  
 10 confinement. Unlike the other two scenarios, time periods to achieve the percentages of  
 11 protected and released populations in Scenario 2, are given by  $\mathcal{U}(21, 32)$  and  $\mathcal{U}(7, 16)$  dis-  
 12 tributions, respectively. A strategy, similar to the one described for Scenarios 1 and 3, was  
 13 considered to obtain the distributions given in Table 2 and parameters ranges shown in Table  
 14 3.

| Parameter          | Scenario 1                                   | Scenario 2                        | Scenario 3               |
|--------------------|----------------------------------------------|-----------------------------------|--------------------------|
| $\alpha_a$         | 0.0616–1.5879 [24]                           | 0.0616–1.5879 [24]                | 0.5944–1.68 [17]         |
| $\alpha_s$         | 0.0616–1.5879 [24]                           | 0.0616–1.5879 [24]                | 0.5944–1.68 [17]         |
| $\tilde{\alpha}_a$ | 0–1.5*                                       | 0.0616–1.5879 [24]                | 0–0.5*                   |
| $\tilde{\alpha}_s$ | 0–1.5*                                       | 0.0616–1.5879 [24]                | 0–0.5*                   |
| $\hat{\alpha}_a$   | 0–1.5*                                       | 0.0616–1.5879 [24]                | 0–0.5*                   |
| $\hat{\alpha}_s$   | 0–1.5*                                       | 0.0616–1.5879 [24]                | 0–0.5*                   |
| $1/\delta$         | 5 [14]; 6 [25];<br>0.04–25 [24]              | 3.78–6.78 [26];<br>3.01–4.91 [26] | 2–14 [27]                |
| $\theta$           | 0.10–0.95 [28];<br>0.80–0.85 [29]            | 0.25–0.90 [28]                    | 0–0.8*                   |
| $1/\eta_a$         | 7 [28]; 14 [30]                              | 22.9–28.1 [31]; 14 [30]           | 8.2–15.6 [32]            |
| $1/\gamma_s$       | 4 [28]; 1–3.2 [33]                           | 0.8–8.2 [34]                      | 0.8–8.2 [34]             |
| $\beta$            | 0.04375 [28]; 0.075 [35];<br>0.002–0.36 [33] | 0.14 [36]                         | 0.1–0.3*                 |
| $\tau$             | 0–0.3*                                       | 0.0277–0.0997*                    | 0–0.5*                   |
| $1/\psi$           | 7 [28]; 14 [14]                              | 8.2–15.6 [32]                     | 8.2–15.6 [32]            |
| $1/\mu$            | 13 [28]; 7 [35]                              | 3–11 [35]                         | 4.7–10.3*;<br>11–25 [37] |
| $\nu$              | 0.125 [28]; 0.42 [33]                        | 3.8–14.6 [38]                     | 0–0.4*                   |
| $w_{10}$           | 0.04–0.08*                                   | 0.0296–0.1206*                    | 0.04–0.08*               |
| $w_{20}$           | 0.003–0.015*                                 | 0.0022–0.0590*                    | 0.007–0.03*              |

Table 3: Initial parameter ranges and values, taken from current literature or assumed (\*) by the researcher.



- 1 • **Empirical constraint on prevalence:** A study carried out in Spain shed some light about  
2 the highest prevalence percentage in that country, with an estimation around 21.6% [39].  
3 Considering this result, we decided to include solutions where the cumulative number of  
4 infected people, since the first case until day 200, were at most 21.6% of the total population  
5 in Hermosillo.
- 6 • **Data:** The dataset used here is the latest public data on COVID-19, available at the offi-  
7 cial website of the Mexican Federal Government [40], updated at July 19, 2020. Taking  
8 into consideration some decisions adopted by the Mexican government, regarding to lift-  
9 ing confinement measures, the study covered a period spanning from March 11 to May 31.  
10 COVID-19 positive cases considered in this study included Hermosillo residents who were  
11 registered in a medical unit in the Sonora state. Variables under study were daily cases by on-  
12 set of symptoms, hospitalized and ambulatory cases by date of admission to a health service  
13 unit, and also daily deaths.
- **Empirical restriction on epidemic curves:** In order to ensure reasonable solutions, we con-  
sidered an inclusion criterion that consists on selecting those solutions such that the sum of  
squared errors about the data were smaller than some specific upper bound. The reason for  
adopting this criterion was the fact that epidemiological characteristics were not only deter-  
mined by the selected scenarios but also were linked to the actual behavior of the epidemic in  
Hermosillo, Sonora. Next, we briefly describe the steps that were performed to get the upper  
bounds for the sums of squared errors. First, we obtained  $m = 1000$  parameter sets from each  
scenario and then we used them to calculate daily incidence of symptomatic infections, daily  
incidence of hospitalized cases, daily incidence of ambulatory cases, and daily incidence of  
deaths. In order to obtain this information we defined the following variables with respect to  
the model:

$$\begin{aligned} DI_S(k) &= \int_{k-1}^k \theta \delta E(t) dt, & DH(k) &= \int_{k-1}^k \beta \gamma_s I_S(t) dt, \\ DQ(k) &= \int_{k-1}^k (1 - \beta) \gamma_s I_S(t) dt, & DD(k) &= \int_{k-1}^k \nu \mu H(t) dt, \end{aligned} \quad (2.4)$$

14 where  $DI_S(k)$ ,  $DH(k)$ ,  $DQ(k)$  and  $DD(k)$ , are the number of symptomatic infected, hospi-  
15 talized, ambulatory and death cases, respectively, on the  $k$ th day. Then, sums of squared  
16 errors were calculated for each selected variable (daily observed incidence of: symptomatic  
17 infections, hospitalized cases, ambulatory cases, and deaths) about the theoretical counter-  
18 part defined in 2.4. Then, for each scenario and for each variable, the 50th percentile of the  
19 sum of the squared errors is computed, and considered as an upper bound in the next stage  
20 to admit solutions for System 2.1.

- 21 • **Statistics for the analysis:** For each scenario, we obtained its baseline dynamic, selecting  
22 the 5000 solutions from System 2.1, that satisfy the criteria previously explained. Then, we  
23 calculate their corresponding 2.5th, 50th, and 97.5th percentiles. It is important to stress that

1 each solution were obtained throughout a particular parameter combination, that were used  
2 later to explore other dynamics related to dates of lockdown implementation and levels of  
3 relaxation.

## 4 **3 Results**

5 In this section, we applied the methodology previously explained to compute three parameter sets  
6 that are used to define our baseline scenarios. Then, the strengths and weaknesses of our results are  
7 discussed. Finally, we explored some scenarios regarding possible consequences of i) change of  
8 dates for implementing mitigation measures, and ii) lifting mitigation measures on June 01, 2020.

### 9 **3.1 About the ACME occurring time**

10 Based on the three scenarios previously considered, we obtained the quantile-based intervals shown  
11 in Table 4. Fig 2 increased our knowledge about the parameters behavior, providing, for each pa-  
12 rameter and each scenario, some interesting complementary information. In these plots we can  
13 observe that, in some cases, there is no intersection between these empirical distributions, while in  
14 others a considerable overlap occurs. This illustrates a well known problem of parameter identi-  
15 fiability where basically, different parameter regions can provide solutions that could give rise the  
16 observed data; this can actually be observed in Fig 3. Thus, we must be aware that when models  
17 involve too many free parameters, different sets of parameters can also provide a good fit to the  
18 data.

19 To complement the fact previously exposed, we included Fig 4, where the distribution of the max-  
20 imum number of daily new reported, hospitalized, and deaths can be observed. As expected, the  
21 three scenarios provided solutions that in general do not coincide in the ACME levels. However,  
22 our study gave us some certainty in another aspect. For the three scenarios, Fig 5 shows the dis-  
23 tributions of the estimated date of the ACME for the daily new reported, hospitalized, and death  
24 variables. Here, we can clearly observe that Scenarios 2 and 3 presented very similar distributions  
25 for these three variables. In contrast, histograms for Scenario 1 are flattened, their beginning is too  
26 early, and they ended almost at the same dates of Scenarios 2 and 3. Actually, 95% quantile-based  
27 intervals for Scenario 1 will almost contain the ones corresponding to Scenarios 2 and 3. These re-  
28 sults indicate that even when parameters do not provide consistent information about the intensity  
29 of the outbreak, it did preserve the property of having an ACME occurring time in a specific time  
30 interval.

### 31 **3.2 Implications of Lockdown occurrence time**

32 Based on System 2.1 and the parameter ranges and values obtained in previous section, we eval-  
33 uated implications on the magnitude of the variables of interest, if the lockdown had been im-  
34 plemented one or two weeks later than our real scenario. This exploration intends to analyze the  
35 possible consequences of a late decision making. For our simulations, we used 5000 parameter

|                    | Scenario 1 |        |        | Scenario 2 |        |        | Scenario 3 |        |        |
|--------------------|------------|--------|--------|------------|--------|--------|------------|--------|--------|
|                    | 2.5%       | 50%    | 97.5%  | 2.5%       | 50%    | 97.5%  | 2.5%       | 50%    | 97.5%  |
| $\alpha_a$         | 1.2251     | 1.2458 | 1.2657 | 1.2991     | 1.4573 | 1.5577 | 1.1102     | 1.2041 | 1.3017 |
| $\alpha_s$         | 1.1239     | 1.2067 | 1.2846 | 0.8795     | 0.9305 | 0.9903 | 0.5645     | 0.6601 | 0.7553 |
| $\tilde{\alpha}_a$ | 0.0007     | 0.0114 | 0.0304 | 0.0005     | 0.0082 | 0.0147 | 0.0019     | 0.0342 | 0.1017 |
| $\tilde{\alpha}_s$ | 1.1931     | 1.2010 | 1.2085 | 0.2981     | 0.4270 | 0.5374 | 0.0018     | 0.0415 | 0.1241 |
| $\hat{\alpha}_a$   | 0.0557     | 0.1517 | 0.2445 | 0.0018     | 0.0342 | 0.0752 | 0.0018     | 0.0371 | 0.1129 |
| $\hat{\alpha}_s$   | 0.4876     | 0.5796 | 0.6526 | 0.7445     | 0.8643 | 0.9742 | 0.0019     | 0.0417 | 0.1242 |
| $\delta$           | 0.2573     | 0.2927 | 0.3317 | 0.1789     | 0.2223 | 0.2510 | 0.1604     | 0.2157 | 0.3049 |
| $\theta$           | 0.0194     | 0.1072 | 0.1961 | 0.2274     | 0.2748 | 0.3634 | 0.1720     | 0.2109 | 0.2481 |
| $\eta_a$           | 0.1013     | 0.1470 | 0.1909 | 0.0404     | 0.0479 | 0.0638 | 0.0792     | 0.0954 | 0.1158 |
| $\gamma_s$         | 0.5447     | 1.2334 | 1.9548 | 0.7298     | 1.0890 | 1.7143 | 0.1294     | 0.3300 | 1.0376 |
| $\beta$            | 0.1424     | 0.1877 | 0.2458 | 0.0751     | 0.1049 | 0.1295 | 0.0769     | 0.1386 | 0.2293 |
| $\tau$             | 0.0050     | 0.0885 | 0.1933 | 0.0304     | 0.0636 | 0.0969 | 0.1057     | 0.1972 | 0.2945 |
| $\psi$             | 0.0207     | 0.2466 | 0.4889 | 0.0532     | 0.1065 | 0.1573 | 0.0610     | 0.0797 | 0.0990 |
| $\mu$              | 0.1141     | 0.4374 | 0.7810 | 0.0648     | 0.1067 | 0.1382 | 0.0512     | 0.0744 | 0.0985 |
| $\nu$              | 0.1435     | 0.2067 | 0.2926 | 0.1048     | 0.1632 | 0.2314 | 0.2058     | 0.2944 | 0.3941 |
| $w_{10}$           | 0.0484     | 0.0590 | 0.0738 | 0.0755     | 0.0786 | 0.0854 | 0.0519     | 0.0631 | 0.0776 |
| $w_{20}$           | 0.0033     | 0.0089 | 0.0147 | 0.0007     | 0.0121 | 0.0302 | 0.0076     | 0.0191 | 0.0294 |

Table 4: Median and 95% quantile-based intervals for parameters in System 2.1.

1 combinations of scenario 2, and calculated the quantile 0.5 of all these solutions. Here, we ba-  
 2 sically present hospitalized prevalence, in order to relate this with bed saturation and cumulative  
 3 deaths.

4 It is important to have in mind that in real setting, lockdown took place from March 16 to April 15  
 5 (Baseline). Therefore, we carried out these simulations, for Scenario 2, considering that lockdown  
 6 took place over a time interval from March 23 to April 22 (Intervention A) and also from March  
 7 30 to April 29 (Intervention B). Fig 6 shows the solution for Baseline and these interventions, for  
 8 Scenario 2. From the figure, we can observe that a considerable increase in the number of daily  
 9 new hospitalizations and deaths would occur if distancing measures were taken two weeks after  
 10 the original date, exhibiting the importance of timely decision making. Corresponding results of  
 11 Scenarios 1 and 3 can be seen in the Section S2 of the Supplementary Material.

### 12 3.3 Possible consequences of lifting mitigation measures

13 On June 01, 2020, Mexican Federal Government established an epidemiological panel. The pur-  
 14 pose of this panel was to assign a color (red, orange, yellow, green) to each one of the states of  
 15 Mexico, and gradually lift mitigation measures, depending on the color assigned to each one of the  
 16 states. However, as a result of this strategy, an unknown number of people returned to their usual

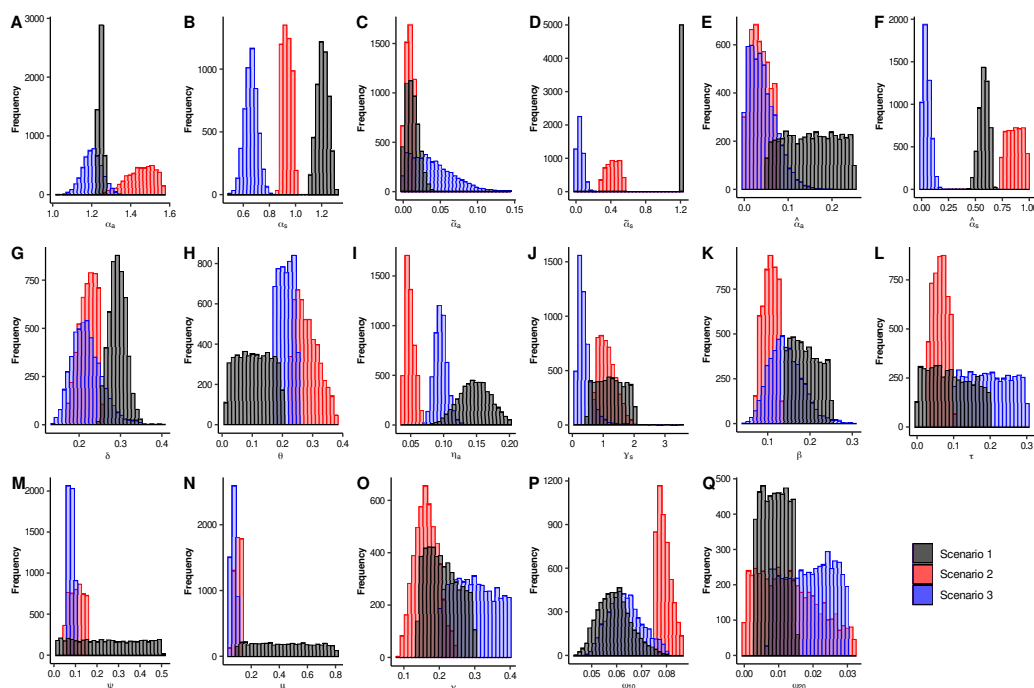

Figure 2: **Histogram for each one of the parameters of System 2.1.** Black, red and blue bars are related to Scenarios 1, 2, and 3, respectively.

1 activities since June 01, 2020, independently of the color that this panel assigned to a state. Mo-  
 2 tivated by this fact, that also occurred in Hermosillo, Sonora, we explored possible consequences  
 3 that lifting mitigation measures could have on daily new cases, daily new hospitalizations and daily  
 4 deaths.

5 Fig 7 shows some epidemic curves under Scenario 2. Here, each curve represents quantile 0.5  
 6 of all solutions when considering different proportions of individuals returning to usual activities  
 7 on June 01, 2020. Baseline curve (solid blue line) represents disease dynamics without lifting  
 8 mitigation measures. The scenarios named Lifting A, B, and C were constructed considering that  
 9 approximately 16%, 33%, and 66% of the population, that fulfilled with social-distancing mea-  
 10 sures, returned to their usual activities on June 01, 2020, respectively. Here, we can deduce that the  
 11 number of people returning to their usual activities, is directly affecting the ACME level of these  
 12 epidemic curves, which also depend on the adopted social-distancing measures. The latter will be  
 13 discussed on Supplementary Material. Finally, it is important to have in mind that the Monte Carlo  
 14 study considered data reported up to May 31, since in June 01, mitigation measures were relaxed,  
 15 causing an increase in mobility. For scenario 2, when comparing our results with the data reported  
 16 up to August 14, a poor fitting can be observed in some periods. However, it is important to men-  
 17 tion that there is a delay in the information reported by the Federal Government since, as of August

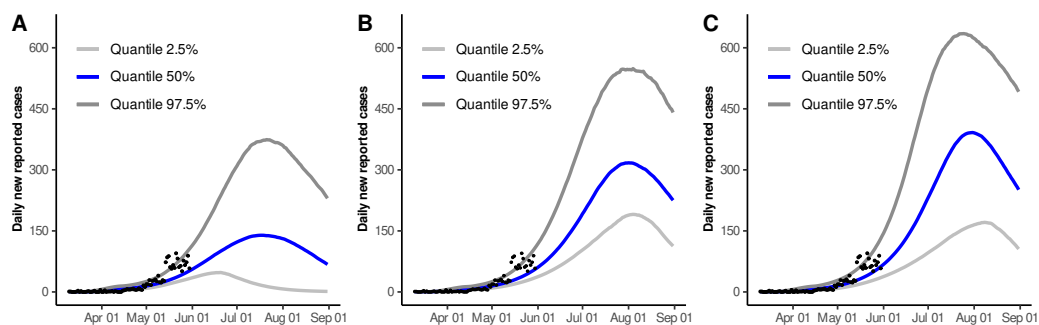

Figure 3: **95% quantile-based intervals and median estimates for the solution curve of daily new reported cases.** A) Dynamics for Scenario 1. B) Dynamics for Scenario 2. C) Dynamics for Scenario 3. Black dots represent available data from March 11 to May 31 (accessed on July 19).

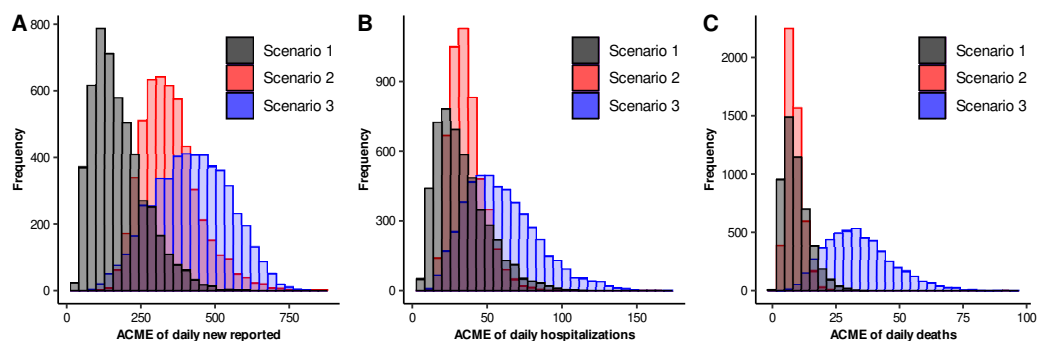

Figure 4: **Histograms of ACME levels for different epidemic curves.** Black, red and blue bars are related to Scenarios 1, 2, and 3, respectively. A) ACME of daily new reported cases. B) ACME of daily hospitalizations. C) ACME of daily deaths.

1 14, this entity reported 8535 cumulative infected, while the Sonora Government reported 11362  
 2 cumulative infected. The latter makes us think that the adjustment presented for the new daily  
 3 cases is good. Section S3 of the Supplementary Material includes these analyses under Scenarios  
 4 1 and 3, and similar characteristics were observed.

## 5 **4 Discussion**

6 The comprehension of the COVID-19 epidemic has become a major interest area of study due not  
 7 only to the lives that have been lost worldwide but also to the economic damages that it caused in  
 8 different regions in the world. Nowadays, data availability about this epidemic has allowed to show  
 9 how different mathematical models and statistical techniques are useful for providing valuable

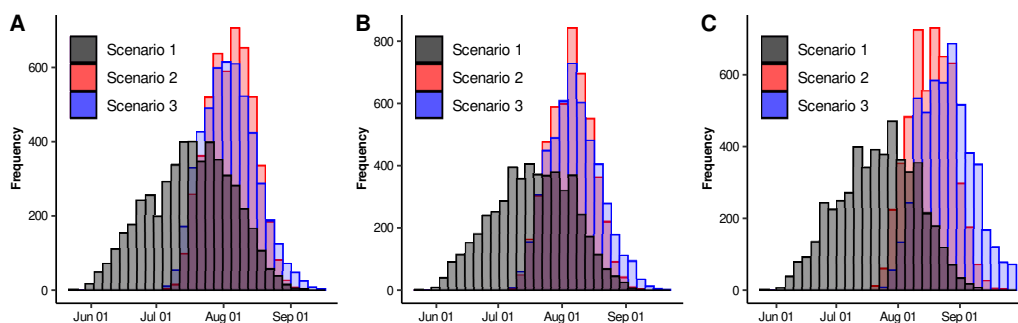

Figure 5: **Histograms of ACME dates for different epidemic curves.** Black, red and blue bars are related to Scenarios 1, 2, and 3, respectively. A) ACME of daily new reported cases. B) ACME of daily hospitalizations. C) ACME of daily deaths.

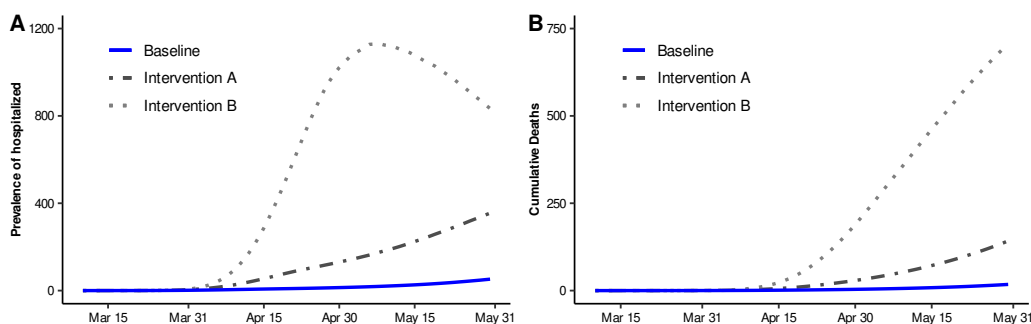

Figure 6: **Median estimates for some epidemic curves.** Blue solid line represents our baseline dynamics for Scenario 2. Dotted-dashed line represents Intervention A, whose mitigation measures are supposed to start on March 23. Dotted line represents Intervention B, whose mitigation measures are assumed to begin on March 30. A) Prevalence of hospitalized. B) Cumulative deaths.

1 information related to decision making, in many particular regions. Moreover, these models are  
 2 setting the basis for preventing and controlling more catastrophic scenarios in a possible second  
 3 wave or under the presence of a different propagating virus.  
 4 In particular, being researchers in a university where social responsibility is a core mission, our  
 5 interest was not only focused on the problem of building models to understand the COVID epi-  
 6 demic, but also to provide to the Sonoran Health Ministry with insights regarding the possible  
 7 consequences of an immediate return to the daily activities, as requested. Then our goal, as in  
 8 many other places of the world, was to explore strategies for releasing population to their daily ac-  
 9 tivities, being always in control about the number of seriously ill individuals and the availability of  
 10 hospital facilities. Our studies were merely from the epidemiological point of view and the results

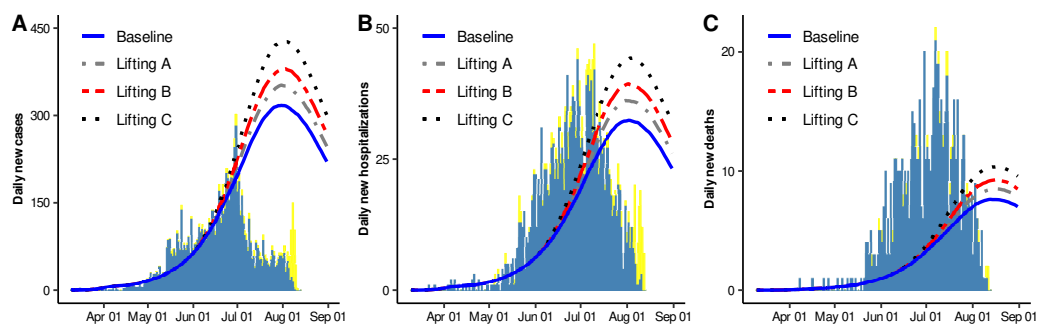

Figure 7: **Median estimates for A) Daily new cases, B) Daily new hospitalizations, and C) Daily new deaths.** Blue solid line represents our baseline dynamics. Grey dotted-dashed, red dashed and black dotted lines represent that approximately 16%, 33%, and 66% of the population that fulfilled with social-distancing measures returned to their usual activities on June 01, 2020, respectively. Blue and yellow bars represent confirmed and suspected+confirmed data for Hermosillo, Sonora, Mexico (data accessed on August 12).

1 were valuable for the comprehension of how epidemic curves are affected by changes in confine-  
2 ment, social distance measures and also the proportion of people that can be considered protected  
3 [41]. In the current study, we extended our research question when exploring different timing for  
4 control measures implementation and proportion of released population. However, the government  
5 decision about released individuals actually depended not only on epidemiological factors.

6 Mathematical models, like the one presented here, are useful to understand some qualitative  
7 properties of the evolution of a disease. In that sense, in this work, we proposed a mathematical  
8 model to study COVID-19 dynamics in Hermosillo, Sonora, Mexico. Here, we assessed the tim-  
9 ing to implement different social-distancing scenarios during COVID-19 epidemic and explored  
10 different levels of mitigation-measure relaxation. In order to obtain our baseline dynamics, we  
11 conducted a Monte Carlo study, and under three different scenarios, some epidemic curves were  
12 fitted. This methodology helped us to set three-parameter distribution sets that adjust the data.

13 Our results showed that the three scenarios agreed on what is called the ACME occurring time, so  
14 there might be information contained in the structure of the epidemic and in the model itself that  
15 might lead us to observe these results. According to our findings, the median dates for the ACME  
16 of incidence cases would occur between July 18 and August 6. These results were consistent with  
17 ongoing surveillance data provided by local health authorities, which reported the incidence peak  
18 by the 31st epidemiological week (July 27 – August 2). Since then, decrements have been observed  
19 for incidence cases and hospitalizations [42]. In summary, our model described well the epidemic  
20 dynamic and the impact of lockdown intervention measures throughout time.

21 On the other hand, our findings also suggest that a hypothetical delay of two weeks (interven-  
22 tion B) for the implementation of the lockdown measures would result in an early peak (May 9).  
23 Moreover, the two weeks delay considered in intervention B, would increment in about 42 times



1 the cumulative deaths, when compared to the ones observed under our baseline, by May 31. In the  
2 absence of a vaccine or an effective treatment, the implementation of social distancing measures  
3 at the early stages of this pandemic, helped to delay and slowdown the epidemic dynamic, allow-  
4 ing to gain time to strengthen healthcare capacities, avoiding being overwhelmed by an excessive  
5 demand.

6 Regarding lifting mitigation measures it was shown that changes in daily cases, hospitalizations,  
7 and deaths, depended on the proportion of people released to the public space on June 01. Fig 7A  
8 shows that ACME levels varied from 11% to 35% at the peak of the outbreak compared to baseline.  
9 Our conclusion regarding this issue must be conservative, since these results clearly depend on the  
10 population proportion who returned to usual activities. An important factor that influences on  
11 the magnitude of this proportion, is the poverty level [43] and according to official data, 35%  
12 of the occupied labor force have informal jobs [44], and 19% lives in poverty condition [45].  
13 Economic inequalities contribute to impeding that a significant proportion of people could maintain  
14 a rigorous lockdown, since their conditions force them to return to work. Improvements not just in  
15 surveillance but social data, at local level, will benefit future estimations.

16 It is important to highlight, that some differences concerning the median and quantile-based in-  
17 tervals for the solution curve of daily new reported cases were observed between Scenarios 1, 2  
18 and 3 (see Fig 3 in this document and Fig 1S inside Supplementary Material). Similar behaviors  
19 regarding the intensity of the peaks can be observed when comparing Fig 7 with Fig 3S, inside  
20 Supplementary Material. In that sense, it is meaningless to talk about predictability on the inten-  
21 sity of the outbreak, when using a model like the one considered here. However, additional specific  
22 pieces of information, could be useful to discriminate spurious solutions and head toward having a  
23 predictive nature of these results. For example, in Scenario 3, the results claim that released pro-  
24 tected, and protected people are infecting practically at the same rate. In other words, people that  
25 have returned to their daily activities are protecting themselves as if they still were in the protected  
26 class. For this Scenario, results did not show variability in the peaks intensity, when considering  
27 different proportions of individuals released on June 01 (see Fig 3S in Supplementary Material).

28 As a final note, the inclusion of the vital dynamics in the model can be useful when studying the  
29 evolution of the disease for longer periods. For example, it can be helpful to provide qualitative  
30 information on a possible second outbreak that might occur during the flu season, which runs from  
31 September to January.

## 32 **Acknowledgments**

33 We sincerely thank to CONACYT for the financial support, under the project 313269: UNISON  
34 COVID-19: Comportamiento del brote epidémico COVID-19 en Sonora, bajo diferentes escenarios  
35 de control. Project Manager: Gudelia Figueroa Preciado.

## 1 Author Contributions

- 2 **Conceptualization:** José A. Montoya-Laos, Manuel A. Acuña-Zegarra, Daniel Olmos-Liceaga,  
3 Pablo A. Reyes-Castro, Gudelia Figueroa-Preciado.  
4 **Data curation:** Mayra R. Tocto-Erazo.  
5 **Formal analysis:** Mayra R. Tocto-Erazo, Jorge A. Espíndola-Zepeda, José A. Montoya-Laos.  
6 **Funding acquisition:** Gudelia Figueroa-Preciado.  
7 **Methodology:** Mayra R. Tocto-Erazo, Jorge A. Espíndola-Zepeda, José A. Montoya-Laos, Manuel  
8 A. Acuña-Zegarra, Daniel Olmos-Liceaga.  
9 **Project administration:** José A. Montoya-Laos.  
10 **Software:** Mayra R. Tocto-Erazo, Jorge A. Espíndola-Zepeda, José A. Montoya-Laos, Manuel A.  
11 Acuña-Zegarra.  
12 **Supervision:** José A. Montoya-Laos, Manuel A. Acuña-Zegarra.  
13 **Visualization:** Mayra R. Tocto-Erazo, Jorge A. Espíndola-Zepeda.  
14 **Writing – original draft:** Mayra R. Tocto-Erazo, Jorge A. Espíndola-Zepeda, José A. Montoya-  
15 Laos, Manuel A. Acuña-Zegarra, Daniel Olmos-Liceaga, Pablo A. Reyes-Castro, Gudelia Figueroa-  
16 Preciado.  
17 **Writing – review & editing:** José A. Montoya-Laos, Manuel A. Acuña-Zegarra, Daniel Olmos-  
18 Liceaga, Pablo A. Reyes-Castro, Gudelia Figueroa-Preciado.

## References

- [1] Wu F, Zhao S, Yu B, Chen YM, Wang W, Song ZG, et al. A new coronavirus associated with human respiratory disease in China. *Nature*. 2020;579(7798):265–269. doi:10.1038/s41586-020-2008-3.
- [2] Wang C, Horby PW, Hayden FG, Gao GF. A novel coronavirus outbreak of global health concern. *The Lancet*. 2020;395(10223):470–473. doi:10.1016/S0140-6736(20)30185-9.
- [3] Dong E, Du H, Gardner L. An interactive web-based dashboard to track COVID-19 in real time. *The Lancet infectious diseases*. 2020;20(5):533–534. doi:10.1016/S1473-3099(20)30120-1.
- [4] CONACyT, CentroGeo, GeoInt, DataLab. COVID-19 Dashboard México; 2020 (accessed June 23, 2020). <http://datos.covid-19.conacyt.mx/index.php>.
- [5] Wang D, Hu B, Hu C, Zhu F, Liu X, Zhang J, et al. Clinical characteristics of 138 hospitalized patients with 2019 novel coronavirus–infected pneumonia in Wuhan, China. *Jama*. 2020;323(11):1061–1069. doi:10.1001/jama.2020.1585.
- [6] Wang C, Deng R, Gou L, Fu Z, Zhang X, Shao F, et al. Preliminary study to identify severe from moderate cases of COVID-19 using combined hematology parameters. *Annals of Translational Medicine*. 2020;8(9). doi:10.21037/atm-20-3391.

- [7] Sun P, Qie S, Liu Z, Ren J, Li K, Xi J. Clinical characteristics of hospitalized patients with SARS-CoV-2 infection: a single arm meta-analysis. *Journal of medical virology*. 2020;92(6):612–617. doi:10.1002/jmv.25735.
- [8] Davies NG, Kucharski AJ, Eggo RM, Gimma A, Edmunds WJ, Jombart T, et al. Effects of non-pharmaceutical interventions on COVID-19 cases, deaths, and demand for hospital services in the UK: a modelling study. *The Lancet Public Health*. 2020;5(7):e375–e385. doi:10.1016/S2468-2667(20)30133-X.
- [9] Kucharski AJ, Russell TW, Diamond C, Liu Y, Edmunds J, Funk S, et al. Early dynamics of transmission and control of COVID-19: a mathematical modelling study. *The lancet infectious diseases*. 2020;20(5):553–558. doi:10.1016/S1473-3099(20)30144-4.
- [10] Secretaría de Gobernación, Diario Oficial de la Federación. Acuerdo por el que se establecen las medidas preventivas que se deberán implementar para la mitigación y control de los riesgos para la salud que implica la enfermedad por el virus SARS-CoV2 (COVID-19); 2020 (accessed March 24, 2020). [https://www.dof.gob.mx/nota\\_detalle.php?codigo=5590339&fecha=24/03/2020](https://www.dof.gob.mx/nota_detalle.php?codigo=5590339&fecha=24/03/2020).
- [11] Haffajee RL, Mello MM. Thinking globally, acting locally—The US response to COVID-19. *New England Journal of Medicine*. 2020;382(22):e75. doi:10.1056/NEJMp2006740.
- [12] Anastassopoulou C, Russo L, Tsakris A, Siettos C. Data-based analysis, modelling and forecasting of the COVID-19 outbreak. *PloS one*. 2020;15(3):e0230405. doi:10.1371/journal.pone.0230405.
- [13] Acuña-Zegarra MA, Santana-Cibrian M, Velasco-Hernandez JX. Modeling behavioral change and COVID-19 containment in Mexico: A trade-off between lockdown and compliance. *Mathematical Biosciences*. 2020;325:108370. doi:10.1016/j.mbs.2020.108370.
- [14] Chatterjee K, Chatterjee K, Kumar A, Shankar S. Healthcare impact of COVID-19 epidemic in India: A stochastic mathematical model. *Medical Journal Armed Forces India*. 2020;76(2):147–155. doi:10.1016/j.mjafi.2020.03.022.
- [15] Giordano G, Blanchini F, Bruno R, Colaneri P, Di Filippo A, Di Matteo A, et al. Modelling the COVID-19 epidemic and implementation of population-wide interventions in Italy. *Nature Medicine*. 2020;26(6):1–6. doi:10.1038/s41591-020-0883-7.
- [16] Vega DI. Lockdown, one, two, none, or smart. Modeling containing COVID-19 infection. A conceptual model. *Science of the Total Environment*. 2020;730:138917. doi:10.1016/j.scitotenv.2020.138917.
- [17] Lin Q, Zhao S, Gao D, Lou Y, Yang S, Musa SS, et al. A conceptual model for the outbreak of Coronavirus disease 2019 (COVID-19) in Wuhan, China with individual reaction

- and governmental action. *International journal of infectious diseases*. 2020;93:211–216. doi:10.1016/j.ijid.2020.02.058.
- [18] Prem K, Liu Y, Russell TW, Kucharski AJ, Eggo RM, Davies N, et al. The effect of control strategies to reduce social mixing on outcomes of the COVID-19 epidemic in Wuhan, China: a modelling study. *The Lancet Public Health*. 2020;5(5):e261–e270. doi:10.1016/S2468-2667(20)30073-6.
- [19] Mandal M, Jana S, Nandi SK, Khatua A, Adak S, Kar T. A model based study on the dynamics of COVID-19: Prediction and control. *Chaos, Solitons & Fractals*. 2020;136:109889. doi:10.1016/j.chaos.2020.109889.
- [20] Jewell NP, Lewnard JA, Jewell BL. Predictive mathematical models of the COVID-19 pandemic: Underlying principles and value of projections. *Jama*. 2020;323(19):1893–1894. doi:10.1001/jama.2020.6585.
- [21] Roda WC, Varughese MB, Han D, Li MY. Why is it difficult to accurately predict the COVID-19 epidemic? *Infectious Disease Modelling*. 2020;5. doi:10.1016/j.idm.2020.03.001.
- [22] Consejo Nacional de Población (CONAPO). Proyecciones de la Población de los Municipios de México, 2015-2030; 2020 (accessed August 14, 2020). <https://datos.gob.mx/busca/dataset/proyecciones-de-la-poblacion-de-mexico-y-de-las-entidades-federativas-2016-2050>.
- [23] Tocto-Eraza MR. Shiny app script; 2020. [https://github.com/BioMatUnison/COVID-19\\_Project/tree/master/AppModel](https://github.com/BioMatUnison/COVID-19_Project/tree/master/AppModel).
- [24] Liu X, Hewings GJ, Wang S, Qin M, Xiang X, Zheng S, et al. Modeling the situation of COVID-19 and effects of different containment strategies in China with dynamic differential equations and parameters estimation. *medRxiv*. 2020;doi:10.1101/2020.03.09.20033498.
- [25] World Health Organization. Coronavirus disease 2019 (COVID-19): situation report, 73; 2020 (accessed April 02, 2020). <https://apps.who.int/iris/bitstream/handle/10665/331686/nCoVsitrep02Apr2020-eng.pdf?sequence=1&isAllowed=y>.
- [26] Ganyani T, Kremer C, Chen D, Torneri A, Faes C, Wallinga J, et al. Estimating the generation interval for coronavirus disease (COVID-19) based on symptom onset data, March 2020. *Eurosurveillance*. 2020;25(17):2000257. doi:10.2807/1560-7917.ES.2020.25.17.2000257.
- [27] Linton NM, Kobayashi T, Yang Y, Hayashi K, Akhmetzhanov AR, Jung Sm, et al. Incubation period and other epidemiological characteristics of 2019 novel coronavirus infections with right truncation: a statistical analysis of publicly available case data. *Journal of clinical medicine*. 2020;9(2):538. doi:10.3390/jcm9020538.
- [28] Capistrán MA, Capella A, Christen JA. Forecasting hospital demand during COVID-19 pandemic outbreaks; 2020; arXiv:2006.01873.

- [29] Mizumoto K, Kagaya K, Zarebski A, Chowell G. Estimating the asymptomatic proportion of coronavirus disease 2019 (COVID-19) cases on board the Diamond Princess cruise ship, Yokohama, Japan, 2020. *Eurosurveillance*. 2020;25(10):2000180. doi:10.2807/1560-7917.ES.2020.25.10.2000180.
- [30] Mission, WHO-China Joint. Report of the WHO-China Joint Mission on Coronavirus Disease 2019 (COVID-19); 2020 (accessed May 04, 2020). Available from: [https://www.who.int/publications/i/item/report-of-the-who-china-joint-mission-on-coronavirus-disease-2019-\(covid-19\)](https://www.who.int/publications/i/item/report-of-the-who-china-joint-mission-on-coronavirus-disease-2019-(covid-19)).
- [31] Verity R, Okell LC, Dorigatti I, Winskill P, Whittaker C, Imai N, et al. Estimates of the severity of coronavirus disease 2019: a model-based analysis. *The Lancet infectious diseases*. 2020;20(6):669–677. doi:10.1016/S1473-3099(20)30243-7.
- [32] Lauer SA, Grantz KH, Bi Q, Jones FK, Zheng Q, Meredith HR, et al. The incubation period of coronavirus disease 2019 (COVID-19) from publicly reported confirmed cases: estimation and application. *Annals of internal medicine*. 2020;172(9):577–582. doi:10.7326/M20-0504.
- [33] Arenas A, Cota W, Gomez-Gardenes J, Gómez S, Granell C, Matamalas JT, et al. A mathematical model for the spatiotemporal epidemic spreading of COVID19. *MedRxiv*. 2020;doi:10.1101/2020.03.21.20040022.
- [34] Tian S, Hu N, Lou J, Chen K, Kang X, Xiang Z, et al. Characteristics of COVID-19 infection in Beijing. *Journal of Infection*. 2020;20(6):669–677. doi:10.1016/j.jinf.2020.02.018.
- [35] Yang X, Yu Y, Xu J, Shu H, Liu H, Wu Y, et al. Clinical course and outcomes of critically ill patients with SARS-CoV-2 pneumonia in Wuhan, China: a single-centered, retrospective, observational study. *The Lancet Respiratory Medicine*. 2020;8(5):475–481. doi:10.1016/S2213-2600(20)30079-5.
- [36] Stokes EK, Zambrano LD, Anderson KN, Marder EP, Raz KM, Felix SEB, et al. Coronavirus Disease 2019 Case Surveillance—United States, January 22–May 30, 2020. *Morbidity and Mortality Weekly Report*. 2020;69(24):759–765. doi:10.15585/mmwr.mm6924e2.
- [37] Lei S, Jiang F, Su W, Chen C, Chen J, Mei W, et al. Clinical characteristics and outcomes of patients undergoing surgeries during the incubation period of COVID-19 infection. *EClinicalMedicine*. 2020;21:100331. doi:10.1016/j.eclinm.2020.100331.
- [38] Mi Yn, Huang Tt, Zhang Jx, Qin Q, Gong Yx, Liu Sy, et al. Estimating instant case fatality rate of COVID-19 in China. *International Journal of Infectious Diseases*. 2020;97:1–6. doi:10.1016/j.ijid.2020.04.055.
- [39] Pollán M, Pérez-Gómez B, Pastor-Barriuso R, Oteo J, Hernán MA, Pérez-Olmeda M, et al. Prevalence of SARS-CoV-2 in Spain (ENE-COVID): a nationwide, population-based

seroepidemiological study. *The Lancet*. 2020;396(10250):535–544. doi:10.1016/S0140-6736(20)31483-5.

- [40] Gobierno de México. Datos Abiertos; 2020 (accessed August 14, 2020). <https://www.coronavirus.gob.mx/datos/>.
- [41] Figueroa Preciado G, Montoya Laos JA, Olmos Liceaga D, Acuña Zegarra MA, Minjárez Sosa JA, Burgos Flores B, et al.. Escenarios de Modelación - PROYECTO UNISON COVID-19; 2020 (accessed August 15, 2020). <https://www.unison.mx/wp-content/uploads/2020/05/Reporte-Biomatematica-entregado-a-la-Secretaria-de-Salud-mayo7-2020.pdf>.
- [42] Departamento de Matemáticas-UNISON, Secretaría de Salud-Sonora. Dashboard Unison COVID-19 Sonora; 2020 (accessed August 11, 2020). <https://www.covid19data.unison.mx/#resumen>.
- [43] Pablos-Méndez A, Vega J, Aranguren FP, Tabish H, Raviglione MC. Covid-19 in Latin America. 2020;370:m2939. doi:10.1136/bmj.m2939.
- [44] Instituto Nacional de Estadística y Geografía (INEGI). Encuesta Nacional de Ocupación y Empleo (4 trimestre de 2019); 2020 (accessed August 14, 2020). <https://www.inegi.org.mx/programas/enoe/15ymas/>.
- [45] Consejo Nacional de Evaluación de la Política de Desarrollo Social (CONEVAL). Anexo estadístico de pobreza municipal 2010 y 2015; 2020 (accessed August 11, 2020). [https://www.coneval.org.mx/Medicion/Paginas/AE\\_pobreza\\_municipal.aspx](https://www.coneval.org.mx/Medicion/Paginas/AE_pobreza_municipal.aspx).
